# Supplementary material for: Prospective Longitudinal Changes in the Periodontal Inflamed Surface Area Following Active Periodontal Treatment for Chronic Periodontitis
Source: J Clin Med. 2021 Mar 10;10(6):1165. doi: 10.3390/jcm10061165 (PMC7998532; doi:10.3390/jcm10061165)
Supplement: Supplementary file 1 [file jcm-10-01165-s001.pdf]

## Supplemental Material

Changes in the periodontal inflamed surface area during the 24-month follow-up period

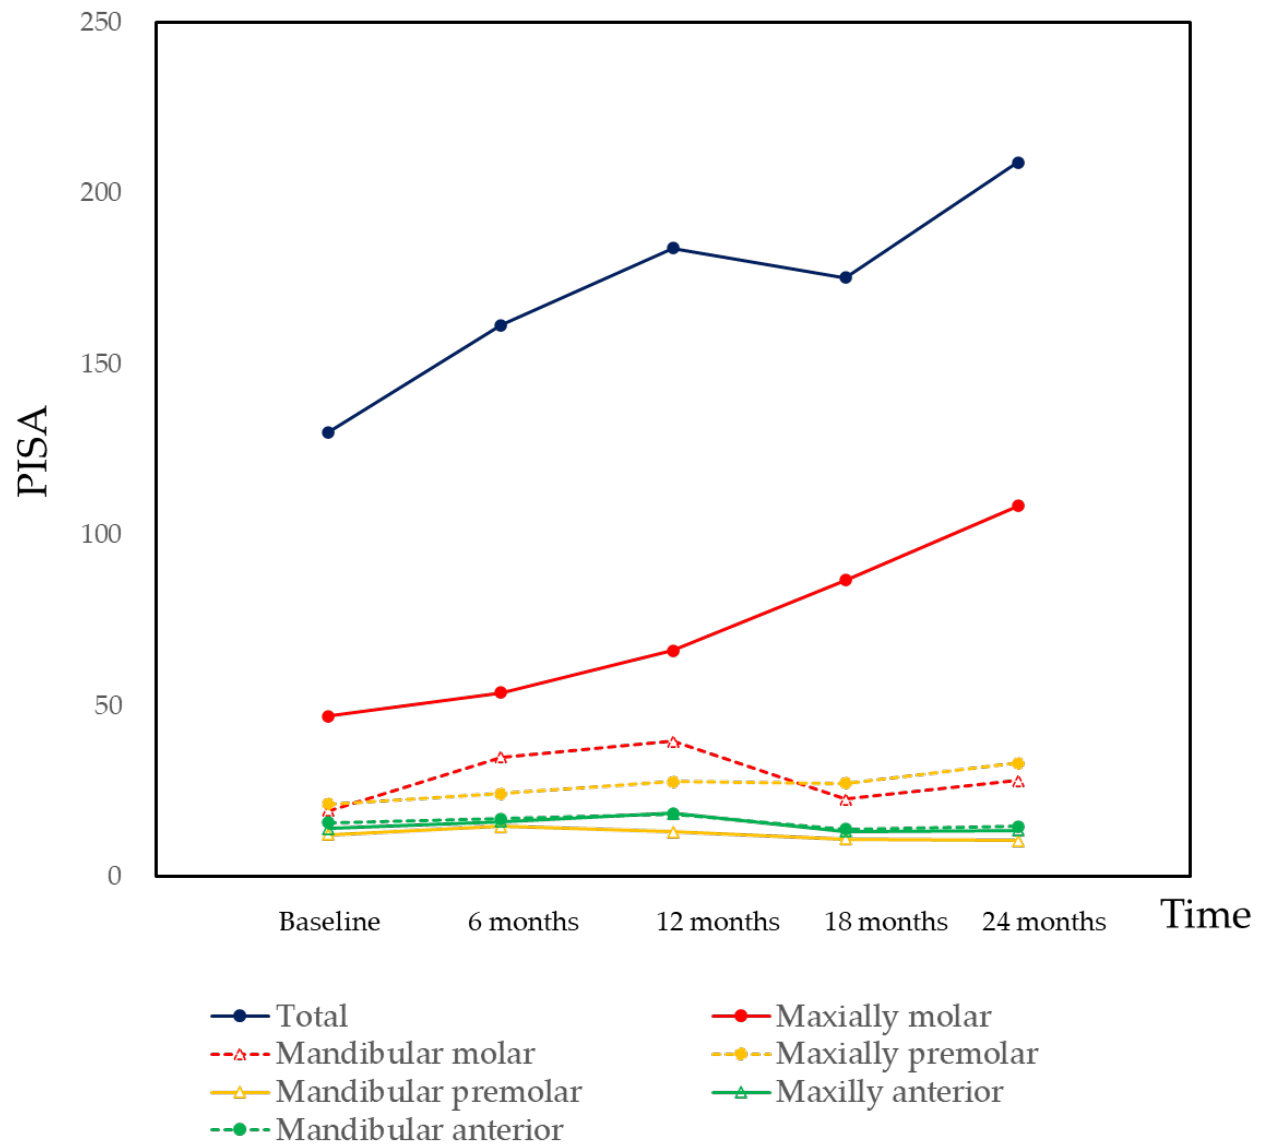

**Figure S1.** Changes in the periodontal inflamed surface area (PISA) during the 24-month follow-up period according to tooth-type

The PISA of the maxillary molar was increased, which may have affected the total PISA.

**Table S1.** List of the sample teeth for the evaluation of periodontal pathogens

|                          | Maxillary |      | Mandibular |      |
|--------------------------|-----------|------|------------|------|
|                          | Right     | Left | Right      | Left |
| 2 <sup>nd</sup> molar    | 11        | 9    | 4          | 6    |
| 1 <sup>st</sup> molar    | 18        | 14   | 5          | 2    |
| 2 <sup>nd</sup> premolar | 7         | 3    | 4          | 1    |
| 1 <sup>st</sup> premolar | 3         | 11   | 2          | 5    |
| Canine                   | 3         | 2    | 1          | 1    |
| Lateral incisor          | 4         | 1    | 2          | 0    |
| Central incisor          | 1         | 2    | 2          | 1    |

From these sample sites, a paper point was inserted into the periodontal pocket and periodontal pathogens were measured by polymerase chain reaction assay.
